# Supplementary material for: Simultaneous estimation of magnetic moment and Brownian relaxation time distributions of magnetic nanoparticles based on magnetic particle spectroscopy for biosensing application
Source: Royal Society of Chemistry journal article supplement (doi:10.1039/d3nr02860g), 2023-01-01
Supplement: d3nr02860g1.pdf [file d3nr02860g1.pdf]

## SUPPLEMENTAL INFORMATION

### Numerical simulations of harmonic magnetizations

We considered spherical single-domain particles whose dynamics in a liquid suspension are dominated by Brownian rotational relaxation. In this case, the behavior of magnetic fluids can be described by the Fokker-Planck equation<sup>1</sup>:

$$2\tau_B \frac{\partial W(\theta, t)}{\partial t} = \frac{1}{\sin \theta} \frac{\partial}{\partial \theta} \left\{ \sin \theta \left[ \xi(t) \sin \theta \cdot W(\theta, t) + \frac{\partial W(\theta, t)}{\partial \theta} \right] \right\}, \# (S1)$$

where  $\theta$  is the angle of the magnetic moment  $m$  with respect to the excitation field of

$H(t) = H_0 \cos \omega t$ ,  $W(\theta, t)$  is the distribution function of  $m$ ,  $\xi(t) = \frac{\mu_0 m H(t)}{k_B T} = \xi_0 \cos \omega t$  is the ratio of excitation field energy to the thermal energy,  $k_B$  is the Boltzmann constant, and  $T$  is the absolute temperature.

We expand  $W(\theta, t)$  into spherical harmonics as

$$W(\theta, t) = \sum_{n=0}^{\infty} a_n(t) P_n(\cos \theta). \#(S2)$$

Where  $P_n(\cos \theta)$  are the Legendre polynomials and  $a_n(t)$  are time-dependent coefficients for each spherical harmonic. Using some recurrence relations and the orthogonal property of Legendre polynomials, we obtain the following infinite set of differential-difference equations<sup>1</sup>.

$$\frac{2\tau_B}{n(n+1)} \dot{a}_n + a_n = \xi(t) \left( \frac{a_{n-1}}{2n-1} - \frac{a_{n+1}}{2n+3} \right). \#(S3)$$

Then, we make the substitution

$$f_n(t) = \int_0^\pi P_n(\cos \theta) W(\theta, t) \sin \theta d\theta. \#(S4)$$

Using the orthogonal property of Legendre polynomials, we obtain the following relation between  $f_n(t)$  and  $a_n(t)$ .

$$f_n(t) = \frac{2a_n(t)}{2n+1} \#(S5)$$

Substituting eqn (S5) into eqn (S3) yields the infinite set of differential-difference equations for  $f_n(t)$ :

$$\tau_B \dot{f}_n(t) + \frac{n(n+1)}{2} f_n(t) = \xi(t) \frac{n(n+1)}{2(2n+1)} [f_{n-1}(t) - f_{n+1}(t)] \#(S6)$$

As our goal is to calculate the magnetization in the steady state, we expand  $f_n(t)$  as a Fourier series

$$f_n(t) = \sum_{k=-\infty}^{\infty} F_k^n(\omega) e^{jk\omega t}, \#(S7)$$

where  $F_k^n(\omega)$  are the complex Fourier coefficients. Since all the  $f_n(t)$  are real, the complex Fourier coefficients satisfy

$$F_{-k}^n(\omega) = [F_k^n(\omega)]^* \quad \#(S8)$$

where the asterisk denotes the complex conjugate.

Substituting eqn (S7) into eqn (S6), we obtain the following recurrence relations for the complex Fourier coefficients.

$$z_{n,k}(\omega)F_k^n(\omega) - \xi_0[F_{k-1}^{n-1}(\omega) + F_{k+1}^{n-1}(\omega) - F_{k-1}^{n+1}(\omega) - F_{k+1}^{n+1}(\omega)] = 0 \quad \#(S9)$$

where 
$$z_{n,k}(\omega) = 2(2n+1) \left[ 1 + j \frac{2\omega\tau_B k}{n(n+1)} \right].$$

Using the matrix continued fraction technique<sup>2</sup>, we can calculate  $F_k^1(\omega)$ . The time response of  $f_1(t)$  in the steady state can be expressed exclusively in terms of the odd-number components of  $F_k^1(\omega)$ . Thus, taking eqn (S8) into account, we obtain

$$f_1(t) = \int_0^\pi W(\theta, t) \sin \theta \cos \theta d\theta = 2 \sum_{k=1}^{\infty} \text{Re} [F_{2k-1}^1(\omega) e^{j(2k-1)\omega t}]. \quad \#(S10)$$

The amplitude of  $(2k-1)$ -th harmonic of the magnetic nanoparticles,  $a_{2k-1}$ , which is given by eqn (9), can be calculated as

$$a_{2k-1} = 2 |F_{2k-1}^1(\omega)|. \quad \#(S11)$$

## References

1. W. T. Coffey, P. J. Cregg and Y. P. Kalmykov, in *Advances in Chemical Physics*, edited by I. Prigogine and S. A. Rice, New York: Wiley, 1993, Vol. 83, p. 263.
2. J. L. Déjardin and Yu. P. Kalmykov, *Phys. Rev. E*, 2000, 61, 1211–1217.
